# Supplementary material for: CASPredict: a web service for identifying Cas proteins
Source: PeerJ. 2021 Jul 30;9:e11887. doi: 10.7717/peerj.11887 (PMC8327967; doi:10.7717/peerj.11887)
Supplement: Supplemental Information 1 [file peerj-09-11887-s001.xlsx]

## Sheet: Training dataset
positive samples	negative samples
A0Q5Y3	Q9T0P4
P0DPB7	O12158
G3ECR1	Q96UP3
P0DOC6	O94474
U2UMQ6	A0A2R8QPS5
A0A0H5SJ89	A8X0L9
U2PSH1	Q9HBD1
C7NBY4	O51578
E4T0I2	Q06190
T0D7A2	Q4VGL6
Q03LF7	P95479
J3F2B0	P41885
Q6D0W9	Q69Z89
C9X1G5	Q5RAN1
Q97WX0	B9GLX8
D4GQN8	P9WJV4
F2XG53|	B3LN76
Q53VY2	A8GKU0
P38036	Q68EM7
Q8U1S6	O18381
O27158	P46893
P71629	Q710E8
Q53W19	Q1ZXC2
Q59066	E3M3V1
B6YWB8	B5F500
Q1CW46	Q1K9Q6
Q57821	B8BMI1
D4GQN5	B8B3I4
Q59068	Q1RE44
Q57828	P78706
Q2RY11	P31426
P38586	Q8CZD8
Q1CW50	O74991
G4RJZ3	Q83R85
Q46901	P34755
Q53VY1	P26033
Q97WX2	P25832
Q59060	P0ABF1
Q53W17	Q8XAN1
Q6D0W8	Q39PN9
E6LHV2	Q9HIH2
A0A0A7HIX6	Q8DW14
Q59061	P43227
P71635	O59721
Q97YD5	A6Q186
Q59062	Q7V9V8
Q57830	Q2LCQ0
P9WJF5	Q081F9
Q2RV90	Q0VIL3
Q46899	Q2NHH7
G4RJZ5	Q3V554
Q97YC1	Q6F973
E6LHV3	Q0V6Q3
Q2FQQ2	Q9XQV1
O28401	P94102
Q02MM1	B7KJK8
D4GQN6	Q59126
Q8U1T1	Q8DBX0
P9WPJ5	Q8HZT6
Q8RED1	A7MFD3
Q8U1S5	B9DSA4
A2BKJ8	B7VMG4
G4RJZ1	C1CY73
Q02MM0	P70236
A1RZT8	P75391
Q6D0X0	B8D610
Q53WG8	Q12UG7
Q8U1S7	P0CW91
Q97YC5	Q6UC88
Q97Y91	Q8BH97
Q97YD2	O21397
Q57826	B1IN35
A0Q5Y4	Q6EMT1
B5YJS2	P08721
P9WPJ1	B5XKW0
Q97WW9	Q8NGC8
Q97WX4	B6YXW4
E6LHV4	B7M0U8
C9X1G6	P56165
Q2FPW6	B5R861
Q07765	Q9UMR5
Q8KB21	Q0T8K3
Q8U1S9	W6KHH6
Q97YD4	Q6AXT9
G3ECR2	Q88N27
Q97WV8	Q3SX64
B6YWC1	B7V1T5
Q97WX1	Q2NVR3
G4RJY8	Q8X897
D4GQN4	Q9LW60
O58931	Q6P848
D4GQN7	Q8WV22
G4RJY6	B2G6Z4
Q97YC6	B4TK05
Q59063	B5EQL5
Q57827	Q4J9A8
Q57829	Q95211
Q58631	Q06348
Q97Y92	B1MH85
Q97WW0	Q87Y59
O58088	Q5V1D5
Q1CW45	O14910
Q746C2	Q4A8U3
O30169	Q31IZ2
G4RJZ4	P62823
G4RJZ2	A9AUP1
Q46898	A3CXP8
E7S4M0	C6A3F2
Q07766	P9WHM4
A3MTK6	B9DND6
Q53WG9	Q474I9
Q97TX9	A3N3U7
Q46897	Q8Y611
Q9YCL9	Q5FH81
A0Q5Y6	Q74MP5
G4RJY5	Q7U7Q3
Q02MM2	C0HKU9
D4GQN9	Q9XGX4
Q7LYJ6	A1W9I4
Q57822	B9IVD1
Q8U1T0	A0LUY9
Q97YC8	Q1GF20
P76632	P61940
Q97WX3	A7MWU1
Q97Y90	Q1AUT6
Q0P899	B4SJW7
E6LHV6	Q48RV9
Q59064	B7NLL0
G4RJZ0	O50291
P58011	A5IEQ9
Q2RV91	A0A075B6I0
P9WJG1	P82896
A6GZS1	P68307
Q57831	Q5M1B8
Q53W05	Q6ME52
P9WPJ3	Q250M1
Q82XY0	P93317
Q8RED2	P07094
B1I4M2	A2X635
Q82XY2	P43486
O28415	Q98314
Q72WF4	B9L175
Q2RY12	A4XV11
Q97YC2	Q2S2L3
Q8TVS8	B8JBR1
A0Q5Y5	A4FPT1
Q1CW51	B1JLQ5
Q2FL79	Q8XFA3
B7KNJ8	C4K1B7
P45956	P0DJC6
D3RW30	Q4ZMC2
A1RZT9	Q8D4S0
Q05E21	A6QCQ0
D3E4V5	B6I184
Q746F4	P0C5V8

## Sheet: Independent testing dataset
positive samples	negative samples
Q99ZW1	B8MW78
J7M7J1	Q0I912
F2K1V9	Q0HNY4
X5EPV9	Q0I0F2
J7M1H5	A5GIF4
E6GPD7	Q32AH9
A0A0F8IEL4	A1AS76
B6YTB8	Q9XAT2
D2UG58	Q664G2
Q99YS8	B4SZZ2
Q99ZW0	Q0I1X0
E6GPD6	B7LXT6
A0A6P3CW37	C6DJS3
B6YWC2	Q4K695
B6YWB9	Q3BCQ4
B6YWC0	Q9JT75
Q8TVS2	O57422
Q5HK91	C5D2V1
Q5HK90	Q5M2U1
Q9X2D0	A7ZI02
Q97CJ2	P0CD08
A0A6I8WFN6	Q7XS69
A0A5S8WF78	Q6CS52
A0A6I8WFX5	Q8ZLS5
A0A6I8WFW5	A0JWY8
A0A6I8WFX4	P00480
Q47PJ3	A4GCI2
A0A5S8WF77	A9KDH0
Q47PJ5	C0RJA5
A0A5S8WF87	A6Q6K6
A0A5S8WF82	Q4ZPJ8
Q5NPQ2	A5UIZ0
F0NDX1	Q89KU5
A0A075WFT8	A4Y933
Q47PJ4	P56889
A0A6I8WFX3	P24517
F0NDX2	Q2N9V1
A0A6I8WFW3	P51518
Q47PJ1	Q92HG1
A4Y6G3	P0AAE4
A0A6I8WFN4	P49508
A0A0J9X178	Q98G93
A0A5S8WF79	A3LTT0
A0A5S8WF84	Q2YDW7
A0A5S8WF89	A6VMQ0
Q47PJ2	B7LGZ5
A1RZU2	A7HDZ5
F1D4K1	Q7MM01
Q99YS3	Q9Q716
Q53WH0	Q5UQK9
O28418	B3CML2
Q8U333	P9WIA7
Q8DTU7	Q68D85
O28416	Q9SIU0
F0NDX4	Q6DCQ5
Q5M539	Q7A725
O28407	Q503Q1
F0NDX3	A0KR31
F0NDX6	Q8X150
O28411	B5RFV4
B6YWC3	Q2VWP9
A0A5S8WF83	B7M5Q1
Q5HK94	B1AT66
A0A101DCB5	Q23255
