# Supplementary material for: CASPredict: a web service for identifying Cas proteins
Source: PeerJ. 2021 Jul 30;9:e11887. doi: 10.7717/peerj.11887 (PMC8327967; doi:10.7717/peerj.11887)
Supplement: Supplemental Information 2 [file peerj-09-11887-s002.xlsx]

## Sheet: Cas protein family
Cas EntryID	Family	Subfamily
P0DOC6	CRISPR-associated endoribonuclease Cas13a family.
A0Q7Q2	CRISPR-associated endonuclease Cas12a family.
A0Q5Y3	CRISPR-associated protein Cas9 family.	Subtype II-B subfamily
C7NBY4	CRISPR-associated endoribonuclease Cas13a family.
P45956	CRISPR-associated endoribonuclease Cas2 protein family.	E.coli-subtype subfamily
G3ECR1	CRISPR-associated protein Cas9 family.	Subtype II-A subfamily
Q46897	CRISPR-associated protein Cas6/Cse3/CasE family.	Subtype I-E/Ecoli subfamily
Q46901	CRISPR associated protein CasA/Cse1 family.	Type I-E/Ecoli subfamily
Q99ZW2	CRISPR-associated protein Cas9 family.	Subtype II-A subfamily
Q97YD4	CRISPR-associated protein Csa1 family.
Q02MM2	CRISPR-associated endoribonuclease Cas6 family.	Cas6f/Csy4, subtype I-F/Ypest subfamily
Q53VY2	In the N-terminal section; belongs to the CRISPR-associated nuclease Cas3-HD family.In the central section; belongs to the CRISPR-associated helicase Cas3 family.
A3MTK6	CRISPR-associated exonuclease Cas4 family.
Q97TX9	CRISPR-associated exonuclease Cas4 family.
J7RUA5	CRISPR-associated Cas9 family.	Subtype II-A subfamily
Q46896	CRISPR-associated endonuclease Cas1 family.
T0D7A2	No information available
U2UMQ6	CRISPR-associated endonuclease Cas12a family.
P38036	In the N-terminal section; belongs to the CRISPR-associated nuclease Cas3-HD family.In the central section; belongs to the CRISPR-associated helicase Cas3 family.
F2XG53	In the N-terminal section; belongs to the CRISPR-associated nuclease Cas3-HD family.In the central section; belongs to the CRISPR-associated helicase Cas3 family.
Q57829	CRISPR-associated nuclease Cas3-HD family.
Q8U1S6	CRISPR system Cmr2 family.
Q46898	CRISPR-associated protein Cas5 family.	Subtype I-E/Ecoli subfamily
Q46899	No information available
Q02ML7	CRISPR-associated endonuclease Cas1 family.
Q9KFX8	CRISPR-associated endoribonuclease Cas2 protein family.
Q53WG9	CRISPR-associated protein Cas6/Cse3/CasE family.	Subtype I-E/Ecoli subfamily
J3F2B0	CRISPR-associated protein Cas9 family.	Subtype II-C subfamily
D4GQN4	CRISPR-associated protein Cas6/Cse3/CasE family.
Q03JI6	CRISPR-associated protein Cas9 family.	Subtype II-A subfamily
Q97YC2	CRISPR-associated endoribonuclease Cas2 protein family.
P9WPJ1	CRISPR-associated protein Cas6/Cse3/CasE family.
C9X1G5	CRISPR-associated protein Cas9 family.	Subtype II-C subfamily
Q02ML8	In the N-terminal section; belongs to the CRISPR-associated nuclease Cas3-HD family.In the central section; belongs to the CRISPR-associated helicase Cas3 family.
Q8U336	CRISPR-associated nuclease Cas3-HD family.
Q6D0W9	In the N-terminal section; belongs to the CRISPR-associated nuclease Cas3-HD family.In the central section; belongs to the CRISPR-associated helicase Cas3 family.
Q8U1S4	CRISPR-associated protein Cas6/Cse3/CasE family.
Q1CW50	In the N-terminal section; belongs to the CRISPR-associated exonuclease Cas4 family.In the C-terminal section; belongs to the CRISPR-associated endonuclease Cas1 family.
Q927P4	CRISPR-associated protein Cas9 family.	Subtype II-A subfamily
P76632	CRISPR-associated CasB/Cse2 family.
Q8U1S7	CRISPR system Cmr3 family.
O28401	CRISPR-associated endonuclease Cas1 family.
Q6D0W5	CRISPR-associated endoribonuclease Cas6 family.	Cas6f/Csy4, subtype I-F/Ypest subfamily.
G4RJY6	In the N-terminal section; belongs to the CRISPR-associated endonuclease Cas1 family.In the C-terminal section; belongs to the CRISPR-associated endoribonuclease Cas2 protein family.
A0A0A7HF73	CRISPR-associated endoribonuclease Cas6 family
Q03LF7	CRISPR-associated protein Cas9 family.	Subtype II-A subfamily
O27158	In the N-terminal section; belongs to the CRISPR-associated nuclease Cas3-HD family.In the central section; belongs to the CRISPR-associated helicase Cas3 family.
D4GQN8	In the N-terminal section; belongs to the CRISPR-associated nuclease Cas3-HD family.In the central section; belongs to the CRISPR-associated helicase Cas3 family.
Q74H36	In the N-terminal section; belongs to the CRISPR-associated exonuclease Cas4 family.In the C-terminal section; belongs to the CRISPR-associated endonuclease Cas1 family.
Q97Y84	CRISPR-associated endonuclease Cas1 family
Q2RY11	In the N-terminal section; belongs to the CRISPR-associated exonuclease Cas4 family.In the C-terminal section; belongs to the CRISPR-associated endonuclease Cas1 family.
Q8F1F5	In the N-terminal section; belongs to the CRISPR-associated exonuclease Cas4 family.In the C-terminal section; belongs to the CRISPR-associated endonuclease Cas1 family.
P9WPJ5	CRISPR-associated endonuclease Cas1 family
Q97WW0	CRISPR-associated nuclease Cas3-HD family.
Q8DTE3	CRISPR-associated protein Cas9 family.	Subtype II-A subfamily
Q6D0X0	CRISPR-associated endonuclease Cas1 family.
Q746F4	CRISPR-associated endoribonuclease Cas2 protein family.
A1IQ68	CRISPR-associated protein Cas9 family.	Subtype II-C subfamily
U2PSH1	CRISPR-associated endoribonuclease Cas13a family.
Q6NKI3	CRISPR-associated protein Cas9 family.	Subtype II-C subfamily
Q9CLT2	CRISPR-associated protein Cas9 family.	Subtype II-C subfamily
D4GQP0	CRISPR-associated endonuclease Cas1 family.
D4GQN9	CRISPR-associated exonuclease Cas4 family.
Q0P897	CRISPR-associated protein Cas9 family.	Subtype II-C subfamily
G3ECR2	CRISPR-associated endonuclease Cas1 family.
G3ECR3	CRISPR-associated endoribonuclease Cas2 protein family.
G4RJY5	CRISPR-associated exonuclease Cas4 family.
P38586	CRISPR-associated protein Cas8a1/Csx13 family.	Myxan subtype subfamily
P9WPJ3	CRISPR-associated endoribonuclease Cas2 protein family.
D4GQP1	CRISPR-associated endoribonuclease Cas2 protein family.
Q07765	CRISPR-associated protein Cas7/Cst2/DevR family.	Subtype I-B/Tneap subfamily
G4RJZ3	CRISPR-associated helicase Cas3 family.
G4RJZ4	CRISPR-associated nuclease Cas3-HD family.
Q8U1S9	CRISPR system Cmr4 family.
Q97WX0	CRISPR system Cmr2 family.
A0Q5Y4	CRISPR-associated endonuclease Cas1 family.
D4GQN7	No information available
Q1CW46	In the N-terminal section; belongs to the CRISPR-associated nuclease Cas3-HD family.In the central section; belongs to the CRISPR-associated helicase Cas3 family.
D4GQN6	No information available
Q57821	In the N-terminal section; belongs to the CRISPR-associated nuclease Cas3-HD family.In the central section; belongs to the CRISPR-associated helicase Cas3 family.
A0A0H5SJ89	CRISPR-associated endoribonuclease Cas13a family.
Q07766	CRISPR-associated protein Cas5 family.
A0Q5Y6	CRISPR-associated exonuclease Cas4 family.
A0Q5Y5	CRISPR-associated endoribonuclease Cas2 protein family.
P0DPB7	CRISPR-associated endoribonuclease Cas13a family.
E4T0I2	CRISPR-associated endoribonuclease Cas13a family.
C9X1G6	CRISPR-associated endonuclease Cas1 family.
I3RB26	CRISPR-associated protein Cas6/Cse3/CasE family.
P0DPB8	CRISPR-associated endoribonuclease Cas13a family.
C9X1G7	CRISPR-associated endoribonuclease Cas2 protein family.
Q1RE32	CRISPR-associated endoribonuclease Cas6 family.	Cas6f/Csy4, subtype I-F/Ypest subfamily
Q57828	CRISPR-associated helicase Cas3 family.
Q97WV8	CRISPR-associated endoribonuclease Cas6 family.
Q97Y85	CRISPR-associated endoribonuclease Cas2 protein family.
Q72WF4	CRISPR-associated endoribonuclease Cas2 protein family.
Q746C2	CRISPR-associated protein Cas5 family.	Subtype I-C/Dvulg subfamily
Q1CW51	CRISPR-associated endoribonuclease Cas2 protein family.
Q82W51	CRISPR-associated endoribonuclease Cas2 protein family.
O28403	CRISPR-associated endoribonuclease Cas2 protein family.
Q9X2B6	CRISPR-associated endoribonuclease Cas2 protein family.
F7V5D5	CRISPR-associated endonuclease Cas1 family.
O27155	CRISPR-associated endoribonuclease Cas2 protein family.
Q2FPW6	CRISPR-associated endonuclease Cas1 family.
B5YIU9	CRISPR-associated endonuclease Cas1 family.
B5YL10	CRISPR-associated endonuclease Cas1 family.
Q8U3R3	CRISPR-associated protein Cas6/Cse3/CasE family.
Q57822	CRISPR-associated exonuclease Cas4 family.
Q0SUG8	CRISPR-associated endonuclease Cas1 family.
Q2RRV2	CRISPR-associated exonuclease Cas4 family.
O66692	CRISPR-associated endonuclease Cas1 family.
O58931	CRISPR-associated protein Cas6/Cse3/CasE family.
Q9YCL9	CRISPR-associated exonuclease Cas4 family.
O58938	CRISPR-associated endonuclease Cas1 family.
Q9X2B7	CRISPR-associated endonuclease Cas1 family.
Q97Y91	CRISPR-associated protein Cas7/Cst2/DevR family.	Subtype I-a/Apern subfamily.
E7S4M0	CRISPR-associated Csn2 protein family.
Q02MM1	CRISPR-associated Csy3 family.
Q97YD5	CRISPR-associated Csx1 family.
Q02MM0	CRISPR-associated Csy2 family.
Q02ML9	CRISPR-associated Csy1 family.
Q53WG8	CRISPR-associated endonuclease Cas1 family.
Q53W21	CRISPR-associated endonuclease Cas1 family.
P9WPJ4	CRISPR-associated endonuclease Cas1 family.
Q57823	CRISPR-associated endonuclease Cas1 family.
Q5JGA9	CRISPR-associated endonuclease Cas1 family.
O30236	CRISPR-associated endonuclease Cas1 family.
Q8RED1	CRISPR-associated endonuclease Cas1 family.
Q8KB21	CRISPR-associated endonuclease Cas1 family.
Q2RHR1	CRISPR-associated endonuclease Cas1 family.
B1L400	CRISPR-associated endonuclease Cas1 family.
Q74DC4	CRISPR-associated endonuclease Cas1 family.
Q8KDC4	CRISPR-associated endonuclease Cas1 family.
Q2FNT7	CRISPR-associated endonuclease Cas1 family.
Q2RL66	CRISPR-associated endonuclease Cas1 family.
B5YJS2	CRISPR-associated endonuclease Cas1 family.
Q2RW61	CRISPR-associated endonuclease Cas1 family.
Q57831	CRISPR-associated endoribonuclease Cas2 protein family.
Q2FL78	CRISPR-associated endonuclease Cas1 family.
Q2RY21	CRISPR-associated endonuclease Cas1 family.
A2BKJ8	CRISPR-associated endonuclease Cas1 family.
A1RZT8	CRISPR-associated endonuclease Cas1 family.
Q2RV90	CRISPR-associated endonuclease Cas1 family.
Q97YC1	CRISPR-associated endonuclease Cas1 family.
Q53VV5	CRISPR-associated endonuclease Cas1 family.
O27156	CRISPR-associated endonuclease Cas1 family.
Q8ZZL8	CRISPR-associated endonuclease Cas1 family.
Q8ZZU1	CRISPR-associated endonuclease Cas1 family.
Q8F874	CRISPR-associated endonuclease Cas1 family.
Q74N45	CRISPR-associated endonuclease Cas1 family.
Q2FQQ2	CRISPR-associated endonuclease Cas1 family.
D3E4V4	CRISPR-associated endonuclease Cas1 family.
C7TEQ4	CRISPR-associated endonuclease Cas2 family.
Q8TVS6	CRISPR-associated endonuclease Cas1 family.
Q65TW5	CRISPR-associated protein Cas5 family. Subtype I-C/Dvulg subfamily.
Q8U1T8	CRISPR-associated endoribonuclease Cas2 protein family.
D4GQN5	No information available
Q73QW4	CRISPR-associated endoribonuclease Cas2 protein family.
O58088	CRISPR-associated protein Cas6/Cse3/CasE family.
P9WPJ2	CRISPR-associated endoribonuclease Cas2 protein family.
D3E288	CRISPR-associated endonuclease Cas1 family.
Q8KDC5	CRISPR-associated endoribonuclease Cas2 protein family.
Q5JD44	CRISPR-associated endoribonuclease Cas2 protein family.
A9WJV5	CRISPR-associated endoribonuclease Cas2 protein family.
A9WEP1	CRISPR-associated endoribonuclease Cas2 protein family.
B8DZH3	CRISPR-associated endoribonuclease Cas2 protein family.
Q8RED2	CRISPR-associated endoribonuclease Cas2 protein family.
Q2RL67	CRISPR-associated endoribonuclease Cas2 protein family.
B1L402	CRISPR-associated endoribonuclease Cas2 protein family.
B5YIU7	CRISPR-associated endoribonuclease Cas2 protein family.
B5YJS4	CRISPR-associated endoribonuclease Cas2 protein family.
Q2FQQ4	CRISPR-associated endoribonuclease Cas2 protein family.
Q8TJV8	CRISPR-associated endoribonuclease Cas2 protein family.
Q2RY12	CRISPR-associated endoribonuclease Cas2 protein family.
B5YJS1	CRISPR-associated endoribonuclease Cas2 protein family.
Q2RV91	CRISPR-associated endoribonuclease Cas2 protein family.
Q0P899	CRISPR-associated endoribonuclease Cas2 protein family.
Q745W0	CRISPR-associated endoribonuclease Cas2 protein family.
D3E3B3	CRISPR-associated endonuclease Cas1 family.
Q2RW60	CRISPR-associated endoribonuclease Cas2 protein family.
Q74H35	CRISPR-associated endoribonuclease Cas2 protein family.
Q8F1F4	CRISPR-associated endoribonuclease Cas2 protein family.
Q97Y96	CRISPR-associated endoribonuclease Cas6 family.
Q53VV6	CRISPR-associated endoribonuclease Cas2 protein family.
A9WFZ7	CRISPR-associated endoribonuclease Cas2 protein family.
B1I4M2	CRISPR-associated endoribonuclease Cas2 protein family.
A7HP87	CRISPR-associated endoribonuclease Cas2 protein family.
A1RZT9	CRISPR-associated endoribonuclease Cas2 protein family.
Q2RHR2	CRISPR-associated endoribonuclease Cas2 protein family.
Q82XY0	CRISPR-associated endoribonuclease Cas2 protein family.
O30237	CRISPR-associated endoribonuclease Cas2 protein family.
Q8ZZL9	CRISPR-associated endoribonuclease Cas2 protein family.
Q8DTE5	CRISPR-associated endoribonuclease Cas2 protein family.
D6GRK6	CRISPR-associated endoribonuclease Cas2 protein family.
Q0RE94	CRISPR-associated endoribonuclease Cas2 protein family.
Q2FL79	CRISPR-associated endoribonuclease Cas2 protein family.
Q82XY2	CRISPR-associated endoribonuclease Cas2 protein family.
Q2RX88	CRISPR-associated endoribonuclease Cas2 protein family.
B9M9X6	CRISPR-associated endoribonuclease Cas2 protein family.
A6GZS1	CRISPR-associated endoribonuclease Cas2 protein family.
D3E4V5	CRISPR-associated endoribonuclease Cas2 protein family.
Q6ZEA5	CRISPR-associated endoribonuclease Cas2 protein family.
A2BKJ6	CRISPR-associated endoribonuclease Cas2 protein family.
Q6ZEI1	CRISPR-associated endoribonuclease Cas2 protein family.
Q8ZZU2	CRISPR-associated endoribonuclease Cas2 protein family.
Q74N46	CRISPR-associated endoribonuclease Cas2 protein family.
Q6ZEC6	CRISPR-associated endoribonuclease Cas2 protein family.
G4RJZ1	CRISPR-associated protein Cas7/Cst2/DevR family.	Subtype I-a/Apern subfamily.
Q99ZV9	CRISPR-associated Csn2 protein family.
C7UDU4	CRISPR-associated Csn2 protein family.
G4RJY8	CRISPR-associated protein Csa1 family.
Q8U1T0	CRISPR system Cmr5 family.
Q8U1T1	CRISPR system Cmr6 family.
Q8U1S5	CRISPR system Cmr1 family.
Q97Y90	No information available
F9YQP0	CRISPR-associated endoribonuclease Cas2 protein family.
Q1WVJ7	CRISPR-associated endoribonuclease Cas2 protein family.
Q05E21	CRISPR-associated endoribonuclease Cas2 protein family.
D3RW30	CRISPR-associated endoribonuclease Cas2 protein family.
F5WVJ2	CRISPR-associated endoribonuclease Cas2 protein family.
F0Q2T3	CRISPR-associated endoribonuclease Cas2 protein family.
C6SPT0	CRISPR-associated endoribonuclease Cas2 protein family.
B7KNJ8	CRISPR-associated endoribonuclease Cas2 protein family.
Q8TVS8	CRISPR-associated endoribonuclease Cas2 protein family.
C7CFQ2	CRISPR-associated endoribonuclease Cas2 protein family.
Q57820	CRISPR-associated protein Cas6/Cse3/CasE family.
G4RJZ2	CRISPR-associated protein Cas5 family.	Subtype I-A/Apern subfamily.
Q58631	CRISPR-associated protein Cas6/Cse3/CasE family.
Q1CW45	CRISPR-associated protein Cas6/Cse3/CasE family.	Subtype Myxan subfamily.
Q97Y92	CRISPR-associated protein Cas5 family.	Subtype I-A/Apern subfamily.
Q97YC7	CRISPR-associated protein Cas7/Cst2/DevR family.	Subtype I-a/Apern subfamily.
G3ECR4	CRISPR-associated Csn2 protein family.
Q6D0W8	CRISPR-associated Csy1 family.
Q97WX3	CRISPR system Cmr5 family.
Q97YC6	Cas5 family
G4RJZ5	No information available
Q97WX1	CRISPR system Cmr6 family.
Q97WX4	CRISPR system Cmr4 family.
Q97WX2	CRISPR system Cmr1 family.
Q6D0W6	CRISPR-associated Csy3 family.
Q6D0W7	CRISPR-associated Csy2 family.
P9WPJ0	CRISPR-associated protein Cas6/Cse3/CasE family.
Q97WW2	CRISPR-associated protein Cas5 family.	Subtype I-A/Apern subfamily.
Q57826	CRISPR-associated protein Cas7/Cst2/DevR family.	Subtype I-a/Apern subfamily.
Q57830	CRISPR-associated protein Cas8a2/Csa4 family.	Subtype I-A/Apern subfamily.
Q57827	CRISPR-associated protein Cas5 family.	Subtype I-A/Apern subfamily.
O30169	CRISPR-associated protein Cas5 family.
Q59068	No information available
Q59063	CRISPR-associated Csm3 family.
E6LHV5	CRISPR-associated Csm3 family.
P9WJF9	CRISPR-associated Csm3 family.
P9WJF8	CRISPR-associated Csm3 family.
O27152	CRISPR-associated Csm3 family.
Q7LYJ6	cOA ring nuclease family
P9WJF5	CRISPR-associated Csm5 family.
A0A0A7HF79	CRISPR-associated Csm5 family.
E6LHV3	CRISPR-associated Csm5 family.
P9WJF4	CRISPR-associated Csm5 family.
A0A0A7HFE1	CRISPR-associated Cas10/Csm1 family.
A0A0A7HFE6	CRISPR-associated Csm6 family.
Q53W17	CRISPR-associated Csm6 family.
A0A0A7HIX6	CRISPR-associated Csm6 family.
E6LHV2	CRISPR-associated Csm6 family.
P71635	CRISPR-associated Csm6 family.
A0A0A7HGA1	CRISPR-associated Csm4 family.
P9WJF7	CRISPR-associated Csm4 family.
Q59062	CRISPR-associated Csm4 family.
E6LHV4	CRISPR-associated Csm4 family.
B6YWC1	CRISPR-associated Csm4 family.
P9WJF6	CRISPR-associated Csm4 family.
A0A0A7HIX1	CRISPR-associated Csm2 family.
P9WJG1	CRISPR-associated Csm2 family.
E6LHV6	CRISPR-associated Csm2 family.
Q59064	CRISPR-associated Csm2 family.
P9WJG0	CRISPR-associated Csm2 family.
B6YWB8	CRISPR-associated Cas10/Csm1 family.
P71629	CRISPR-associated Cas10/Csm1 family.
Q59066	CRISPR-associated Cas10/Csm1 family.
Q53W19	CRISPR-associated Cas10/Csm1 family.
O28417	CRISPR system Cmr5 family.
Q53W05	CRISPR system Cmr5 family.
P58011	CRISPR system Cmr5 family.
O28415	No information available
Q53VY1	CRISPR associated protein CasA/Cse1 family.	Type I-E/Ecoli subfamily.
Q59060	CRISPR-associated Csx1 family.
Q97WW9	CRISPR system Cmr3 family.
E6LHV7	CRISPR-associated Cas10/Csm1 family.
A0A0A7HIF0	CRISPR-associated Csm3 family.
Q97YD2	cOA ring nuclease family.
Q8U3V3	CRISPR system Cmr1 family.
Q59061	CRISPR-associated Csm5 family.
Q97YC8	No information available
G4RJZ0	No information available
Q97YC5	No information available
